1 **Paternal multigenerational exposure to an obesogenic diet drives epigenetic**  
2 **predisposition to metabolic disorders**

3 Georges Raad<sup>1, 2, 3</sup>, Fabrizio Serra<sup>1</sup>, Luc Martin<sup>2</sup>, Marie-Alix Derieppe<sup>2,4</sup>, Jérôme Gilleron<sup>5</sup>,  
4 Vera L Costa <sup>1</sup>, Didier F Pisani<sup>2</sup>, Ez-Zoubir Amri<sup>2</sup>, Michele Trabucchi<sup>1†</sup> and Valérie  
5 Grandjean<sup>1†\*</sup>

6

7

8 <sup>1</sup>Université Côte d'Azur, Inserm, C3M, Team Control of Gene Expression (10), Nice, France

9 <sup>2</sup> Université Côte d'Azur, CNRS, Inserm, iBV, Nice, France.

10 <sup>3</sup> Present address, Al-Hadi Laboratory and medical center, Beirut, Lebanon

11 <sup>4</sup> Present address, Université de Bordeaux, Bât B3, Allée Geoffroy St Hilaire, CS 50023  
12 33615 Pessac, France

13 <sup>5</sup>Université Côte d'Azur, Inserm, C3M, Team Cellular and Molecular Pathophysiology of  
14 Obesity and Diabetes (7), Nice, France

15

16 † co-last author

17

18 \*Correspondence to: Valérie Grandjean ([Valerie.Grandjean@unice.fr](mailto:Valerie.Grandjean@unice.fr)).

19

20 **Abstract**

21 Obesity is a growing societal scourge responsible for approximately 4 million deaths  
22 worldwide. Recent studies have uncovered that paternal excessive weight induced by an  
23 unbalanced diet affects the metabolic health of offspring. These reports mainly employed  
24 single-generation male exposure. However, the consequences of multigenerational  
25 unbalanced diet feeding on the metabolic health of progeny remain largely unknown. Here, we  
26 show that maintaining paternal western diet feeding for five consecutive generations in mice  
27 induces a gradual enhancement in fat mass and related metabolic diseases over generations.  
28 Strikingly, chow-diet-fed progenies from these multigenerational western-diet-fed males  
29 develop a “healthy” overweight phenotype that is not reversed after 4 subsequent generations.  
30 Mechanistically, sperm RNA microinjection experiments into zygotes suggest that sperm  
31 RNAs are sufficient for establishment but not for long-term maintenance of epigenetic  
32 inheritance of metabolic pathologies. Progressive and permanent metabolic deregulation  
33 induced by successive paternal western-diet-fed generations may contribute to the worldwide  
34 epidemic of metabolic diseases.

35

## 36 **Introduction**

37 Nongenetic inheritance of newly acquired phenotypes is a new concept in biology whereby  
38 changes induced by specific environmental cues in parents (mothers and/or fathers) can be  
39 transmitted to the next generation [1-3]. This process is evolutionarily conserved and has been  
40 described from worms to humans [4-7]. The fact that environmental cues have the potential to  
41 modify the molecular hereditary information carried by the spermatozoa demonstrates that the  
42 environmentally induced epigenetic modifications [8][8] are not erased through the epigenetic  
43 reprogramming process, causing them to be inherited by the next generations [9, 10]. Although  
44 the role of epigenetic modifications such as DNA methylation [9, 11, 12] and chromatin  
45 modification [13, 14] cannot be excluded in this process, independent experimental data  
46 strongly evoke the central role of sperm RNA as a vector of paternal intergenerational  
47 epigenetic inheritance of, at least, environmentally induced metabolic pathologies [1, 3, 15].  
48 Unlike genetic inheritance, environmentally induced epigenetic alterations are reversible,  
49 enabling the loss of previously acquired characteristics [16]. Although environmental changes  
50 might persist over several generations, most reports have been based on the maintenance of  
51 paternal environmental cues for just one generation [17]. This is particularly true for certain  
52 lifestyle habits, such as eating high-fat and high-sugar junk food, also called a Western diet  
53 (WD). Thus, although people around the world may face multigenerational unbalanced  
54 nutrition, there have been limited studies on its effects on the metabolic health of the progeny.  
55 Herein, we studied the impact of the paternal maintenance of an unhealthy WD for multiple  
56 generations on the metabolic phenotype of both the progenitors and their respective chow-  
57 diet-fed (CD-fed) offspring.

58

## 59 Results

### 60 Feeding successive paternal generations with a diet exacerbates the overweight 61 phenotype and accelerates the development of obesity-associated pathologies

62 To test experimentally whether the maintenance of an unhealthy diet through the paternal  
63 germline influences the metabolic phenotype of the resulting individuals, C57BL6/J male mice  
64 were fed a WD for five consecutive generations (from WD1 to WD5) (**Fig 1A**). According to a  
65 previous study [18], the average body weight of the WD-fed male mice increased gradually  
66 with multigenerational WD feeding (**Fig 1B** and **S1A Fig**). This gradual increase in total body  
67 weight with paternal multigenerational WD feeding was associated with a gradual increase in  
68 perigonadal white adipose tissue (gWAT) mass (**Fig 1C**). Indeed, the gWAT volume measured  
69 by computed tomography increased 2.3-fold and 3.4-fold in WD1 and WD5 mice, respectively,  
70 compared to that of control mice (CD-fed mice) (**S1 Table**). The increase in gWAT mass was  
71 positively correlated with total body weight (perigonadal fat mass versus total body weight;  
72 Spearman's  $r=0.78$ ,  $p < 0.0001$ , **S1B Fig**). It was also associated with the hypertrophy of white  
73 adipocytes, with a median surface cell area of white adipocytes increasing from 1500 to 4000  
74  $\mu\text{m}^2$  from the first (WD1) to the fifth generation (WD5) and with a decreased calculated number  
75 of adipocytes in WD5 compared to the controls (**Fig 1D-1F**). Furthermore, our RNA-seq  
76 comparison between the gWAT of WD1 and WD5 males revealed that multigenerational WD  
77 feeding has a strong impact on the gWAT gene expression profile. In fact, we observed an  
78 increase in differentially expressed genes (DEGs), from 325 in WD1 (with 93 upregulated and  
79 232 downregulated genes) to 1199 (757 upregulated and 442 downregulated) in WD5,  
80 compared to the respective CD-fed mice. Interestingly, while the majority of DEGs in WD1  
81 (66%) were also deregulated in WD5, a minority of DEGs in WD5 (only 8% for the upregulated  
82 genes and 35% for the downregulated genes) were deregulated in WD1 ( $p$  value  $< 0.01$ ).  
83 Importantly, all common genes were deregulated in the same direction (**Fig 1G-1H**).  
84 Interestingly, querying the WD1 and WD5 DEGs against the molecular signature database

85 (MSigDB) collection of curated gene pathway annotations revealed a specific WD5 enrichment  
86 in gene sets associated with CHEN\_METABOLIC\_SYNDROM\_NETWORK (genes forming  
87 the macrophage-enriched metabolic network (MEMN) claimed to have a causal relationship  
88 with metabolic syndrome traits) and with genes potentially regulated by the methylation of  
89 lysine 4 (H3K4) and lysine 27 (H3K27) of histone H3 and by polycomb repressive complex 2  
90 (PRC2) (**S2A-S2B Table 2**) [19].

91 The aforementioned modulations of white adipose tissue in WD generations shed light on the  
92 possible exacerbation of obesity-associated pathologies (such as insulin resistance (and  
93 subsequently type-II diabetes) and nonalcoholic fatty liver disease) [20]. To check this  
94 hypothesis, several metabolic risk parameters related to these pathologies were analyzed in  
95 WD-fed mice (**Table 1**). In comparison with CD-fed mice, circulating plasma levels of leptin,  
96 C-reactive protein (CRP), one marker of inflammation, and total cholesterol were significantly  
97 higher in the WD3 ( $p < 0.01$ ), WD4 ( $p < 0.05$ ) and WD5 ( $p < 0.01$ ) groups but not in the WD1  
98 ( $p = 0.07$ ) or WD2 ( $p = 0.4$ ) groups (**Table 1**). The gradual alterations in these metabolic  
99 parameters over generations were found to be positively correlated with the increase in gWAT  
100 mass (**S1C-S1E Fig**). At the molecular level, the progressive increase in serum leptin over  
101 WD-fed generations was positively correlated with a gradual increase in leptin mRNA levels in  
102 the gWAT of the respective male mice (total plasma leptin and *leptin* mRNA, Spearman's  $r$   
103  $= 0.89$ ,  $p < 0.0001$ , **S1F Fig**), suggesting an accumulation of epigenetic modifications of the  
104 leptin promoter. These results are in line with recent studies showing that leptin upregulation  
105 occurs via epigenetic malprogramming in white adipose tissue [21, 22]. Furthermore, we found  
106 a significantly impaired response in the intraperitoneal glucose tolerance test (GTT) in all WD-  
107 fed mouse groups (**Fig 2A**), which was not associated, except for in WD2-fed males, with an  
108 impaired insulin response, as shown by the intraperitoneal insulin tolerance test (ITT) (**Fig 2B**).  
109 Therefore, unlike the other metabolic parameters, we did not notice any significant  
110 exacerbation of insulin sensitivity in successive generations. Moreover, the response to an  
111 intraperitoneal glucose tolerance test (measured through the AUC-GTT calculation) was not

112 correlated with the gWAT mass (**S1G Fig**). Together, these data might reflect the multifactorial  
113 and complex nature of the pathogenesis of obesity-induced diabetes.

114 Strikingly, although the C57BL6/J-strain male mice fed a WD diet for one generation failed to  
115 develop strong alterations in liver phenotype [23, 24], major abnormalities were observed in  
116 WD5 liver, i.e., organ weight, histological and biochemical parameters. Indeed, the mass of  
117 the WD5 liver (not that of the WD1 liver) was significantly higher than that of the CD specimens  
118 (**Fig 2C**). Furthermore, unlike WD1 liver, histological and biochemical examinations revealed  
119 the presence of macrovesicular steatosis with significantly increased triglyceride (TG) levels in  
120 WD5 liver compared with CD liver ( $p < 0.01$ , respectively) (**Fig 2D-F**). Therefore, the phenotype  
121 of WD5 livers exhibits typical features of fatty liver.

122 Together, both morphological and molecular features demonstrate that multigenerational WD  
123 feeding induced a progressive dysregulation of the male metabolic phenotypes (**S1H Fig**), with  
124 an exacerbation of the gWAT size and gWTA transcriptional alteration as well as of obesity-  
125 associated pathologies such as fatty liver. Therefore, a worsening of the underlying medical  
126 conditions can be potentially transmitted to next generations.

## 127 **Long-term transgenerational epigenetic inheritance of an overweight “healthy”** 128 **phenotype**

129 Previous reports showed that WD-induced metabolic dysregulations during one-generation  
130 exposure could be transmitted across 1 (F1) or 2 generations (F2) fed a CD<sub>2</sub><sup>10</sup>. To investigate  
131 the impact of feeding a WD through several generations on the inheritance of diet-induced  
132 metabolic pathologies, we compared the metabolic status of F1, F2 and F3 cohorts fed a CD  
133 generated from either WD1 or WD5 males (**Fig 3A**). As expected from previous studies [1-3],  
134 male and female F1 progenies derived from WD1 males (F1-WD1) were heavier than the  
135 control animals with CD-fed ancestors (**Fig 3B and 3F**). Although the difference did not reach  
136 significance at the age of 18 weeks, the same trend was also observed for the F1 progenies  
137 derived from WD5 (F1-WD5) male progenies (**Fig 3D and 3H**). This overweight phenotype  
138 was associated with impaired glucose tolerance as measured by the GTT for both the male

139 F1-WD1 and F1-WD5 progenies and the female F1-WD5 mice (**S2E and S2G Fig and S3-S4**  
140 **Tables**). We noticed, however, the absence of intergenerational inheritance of the fatty liver  
141 phenotype observed in the WD5 progenitors.

142 Both male F2-WD1 and F2-WD5 CD-fed progenies were also overweight ( $p < 0.01$ ). This  
143 phenotype was associated with an excessive accrument of gWAT mass of at least 90% over  
144 the control (**Fig. 3C-3E-3G-3I**). Importantly, although the female and male F2-WD5 progenies  
145 were found to be significantly fatter and heavier than the F2-WD1 cohorts, these mice did not  
146 exhibit impaired glucose tolerance (as measured by the GTT) (**S2E, S2G Fig**) or signs of fatty  
147 liver lesions (**S3 Fig**).

148 The metabolic differences were even more striking in both F3 and F4 progenies (**S2A-2D Fig**).  
149 Thus, while the F3-WD1 progenies exhibited metabolic characteristics very similar to control  
150 mice, both males and females of the F3-WD5 progenies were significantly heavier and fatter  
151 ( $p < 0.001$  and  $p < 0.01$ , respectively) than control mice (**Fig 3B-3I and S3 and S4 Tables**). In  
152 parallel, the overweight phenotype was associated only with an increase in gonadal fat mass,  
153 which persisted in the F4-WD5 progenies (**Fig 3**). Strikingly, despite being overweight, the  
154 progenies derived from WD5-fed animals did not display any alteration in terms of glucose  
155 metabolism (**S2E, S2F, S2G, S2H Fig**) and fatty liver pathologies at 4 months of age (**S3 Fig**)  
156 (**S3 and S4 Tables**).

157 Collectively, these data suggest that WD feeding for multiple generations induces stable  
158 germline epigenetic modifications that were not erased after removing the stressor(s) for at  
159 least 4 generations of CD-fed progeny.

## 160 **Sperm RNAs transmit only transient epigenetic inheritance of WD-induced pathologies**

161 Specific signatures of sperm small RNAs from WD-fed mice have been previously shown to  
162 act as a vector of intergenerational epigenetic inheritance of newly acquired pathologies [1, 3,  
163 15, 25]. To determine whether sperm small RNAs are also involved in the long-term

164 maintenance of epigenetic inheritance (transgenerational epigenetic inheritance), we first  
165 searched for small RNA DEGs (adjusted p value<0.05) between WD (WD1 or WD5) and CD  
166 sperm. As shown in **S5 and S6 Tables**, we identified 584 and 614 DEGs in WD1 and WD5,  
167 respectively, compared to the control mice. Interestingly, approximately one-third of DEGs  
168 (190 sequences) were present in both WD1 and WD5 RNA sperm populations (**S4 Fig**).  
169 Among these common small RNAs, we identified several tRNA fragments and microRNAs  
170 known to be involved in short-term epigenetic inheritance of metabolic dysfunction  
171 (intergenerational inheritance) [1, 3] (**S4D-S4E Fig**). These data indicate that sperm RNAs  
172 could be involved in the epigenetic inheritance of metabolic alterations in both WD1 and WD5  
173 males.

174 To further investigate the role of sperm RNAs in the long-term transgenerational epigenetic  
175 inheritance of metabolic alterations, microinjection experiments into naïve zygotes were  
176 performed with total sperm RNA from either WD1 or WD5 males (RNA-WD1 progenies and  
177 RNA-WD5 progenies, respectively) (**Fig 4A**). As previously reported, this experiment faithfully  
178 reproduces the pattern of short-term paternal transmission of environmentally induced  
179 phenotypes in crosses[1, 3, 4, 15, 25]. In agreement with previous studies, male 12-week F1-  
180 RNA-WD1 and F1-RNA-WD5 progenies were heavier than F1-RNA-CD progenies (31 g vs 30  
181 g, p<0.05) (**Fig 4B**). In addition, they displayed glucose and insulin response alterations, as  
182 shown by GTT and ITT analyses, with significantly higher values of the area under the curve  
183 than the controls (**Fig 4D, 4E and S7 Table**). Regarding the fatty liver phenotype, neither  
184 abnormal TG levels nor histological abnormalities were observed in livers from F1-RNA-CD  
185 and F1-RNA-WD progenies. Thus, the metabolic alterations observed in F1-RNA progenies  
186 are partially reminiscent of the WD1 and WD5 male phenotype.

187 Overweight phenotypes and glucose response alterations were partially transmitted to the F2  
188 and F3 generations (**Fig 4, S8 and S9 Tables**). Intriguingly, while we did not observe any liver  
189 abnormalities in F1-RNA progenies, liver histological examinations revealed macro- and  
190 microvesicular steatosis in hepatocytes of two F2-WD overweight males (2 out of 10) (**S5 Fig**).  
191 It should be noted that these abnormal hepatocytes were never observed in RNA-CD



192 progenies. Nevertheless, all the metabolic alterations were completely absent in the F4  
193 generations (**Fig 4 and S10 Table**).

194 The metabolic observed phenotype of WD1 and WD5 progenies obtained by either RNA  
195 microinjection or natural mating exhibited some discrepancies. First, the overweight phenotype  
196 induced by sperm RNA from WD5 males was not exacerbated compared to that induced by  
197 sperm RNA from WD1 males. In fact, no statistically significant difference was observed  
198 among the body weights of the F1, F2 and F3 progenies derived from sperm RNA of WD1-  
199 and WD5 animals. Second, the sperm-RNA-induced overweight phenotype was associated  
200 with glucose metabolic alterations (total body weight and AUC-GTT, Spearman's  $r=0.4$ ,  $p <$   
201  $0.01$ , **Fig 4F**) and was sporadically associated with fatty liver abnormalities, in both WD1 and  
202 WD5 (**S5 Fig**). Last, in contrast to natural mating of WD5, the sperm-RNA-induced overweight  
203 phenotype was not transgenerationally inherited, while the metabolic abnormality was very  
204 stable in the progenies obtained from natural mating of WD5. Taken together, these data  
205 strongly suggest that sperm RNAs are not sufficient for the long-term epigenetic inheritance of  
206 metabolic dysfunctions.

## 207 **Discussion**

208 Growing evidence suggests that an unbalanced diet of the father negatively affects its  
209 metabolic health and that of its progenies. Of particular interest, little attention has been  
210 focused on the effect of paternal successive generations of unbalanced diet exposure on  
211 metabolic health, which may have public health and economic impacts. To this end, we fed  
212 male mice for 5 successive generations on a high-fat, high-sugar diet (western diet, WD) to  
213 compare the metabolic parameters across multiple generations of WD males and to assess  
214 the persistence of the WD-induced metabolic alterations in their subsequent balanced CD-fed  
215 progenies.

216 In summary, our findings reveal that maintaining a WD for several generations promotes a  
217 progressive accumulation of epigenetic alterations in somatic and germ cells throughout  
218 generations. Two lines of evidence support this conclusion. First, ancestral exposure  
219 influences the magnitude of the overweight phenotype. Indeed, a male whose father,

220 grandfather, great grandfather, great-great-grandfather and great-great-great grandfather, up  
221 to 5 generations of exposure, have been fed a WD exhibits the most severe overweight  
222 phenotype associated with serious metabolic alterations. Second, the father's ancestral history  
223 (whether his ancestors were fed an unbalanced diet) affected the pattern of inheritance of this  
224 metabolic pathology.

225 Although it is well described that the development of type 2 diabetes is positively associated  
226 with body weight [26], we did not observe a strong correlation between fat mass and glucose  
227 and insulin sensitivities in males obtained after multigenerational WD feeding. However, we  
228 identified one obese-associated pathology that increased in severity with successive  
229 generations of a WD, namely, hepatic steatosis. Since the diet we used was not described to  
230 induce such disease, the appearance of this phenotype after multigenerational WD feeding  
231 strongly indicates that exposure sensitivity is heightened by multiple generations of exposure,  
232 at least for this diet-associated pathology. Thus, the family food environment, parental dietary  
233 behaviors and family obesity might be an additional clue to explain the increasing incidence of  
234 nonalcoholic fatty liver disease in humans [27].

235 Importantly, multiple generations of WD exposure impact not only the sensitivity to a WD but  
236 also the hereditary makeup, also called background. Indeed, when the father has no WD-fed  
237 ancestor, the fatness of its progenies tends to disappear after WD removal. However, in the  
238 case of fathers with several WD-fed ancestors, the progenies will remain stably overweight for  
239 more than 4 generations. Intriguingly, although the male progenies of the third and fourth  
240 generations of WD5 males were overweight, they did not develop metabolic alterations, such  
241 as glucose/insulin sensitivity alterations and fatty liver disease. Together, these data strongly  
242 suggest that the combination of ancestral and individual diet exposure was both necessary  
243 and sufficient to elicit the most severe metabolic effects in mice.

244 Overall, our findings are in agreement with those of recent studies of multigenerational  
245 exposure performed in several animal models. For instance, in guppies, a wide range of plastic  
246 responses under different light conditions were observed, which were dependent on  
247 multigenerational exposure to different light environments [28]. In mites, zinc element

248 sensitivity increased by continuous multigenerational exposure [29]. In mice, male sensitivity  
249 to environmental estrogens was enhanced by successive generations of exposure [30].  
250 Finally, rats undernourished for 50 generations showed multiple metabolic alterations that  
251 were not reversed in their respective F1 and F2 CD-fed progenies [31]. Together, the present  
252 study and previously published studies indicate that the exacerbation of stress-induced  
253 phenotypes upon multigeneration exposure as well as the stabilization of newly induced  
254 phenotypes is an evolutionarily conserved process. However, the explicit molecular  
255 mechanism(s) of this process is still largely unknown.

256 Single-generation exposure to a WD studies strongly indicates that sperm RNAs are a possible  
257 epigenetic vector of intergenerational epigenetic inheritance of metabolic diseases. However,  
258 these data do not exclude the possible involvement of epigenetic modifications, namely, DNA  
259 methylation, histone modifications and chromatin structure alterations. This study takes a step  
260 further in this direction, showing that sperm RNAs are vectors of intergenerational inheritance  
261 but are not sufficient for the transgenerational inheritance of diet-induced metabolic alterations.  
262 In this context, our transcriptome profile of gWAT may provide important avenues to dissect  
263 the potential molecular mechanism(s) involved in this process, revealing an enrichment in  
264 genes potentially regulated by H3K4/K27 methylation and the PRC2 complex  
265 **(Supplementary Table 2)**.

266 Finally, in the present study, we focused our analyses on perigonadal adipose tissue,  
267 glucose/insulin sensitivity and liver alterations. Considering the healthy and economic  
268 consequences of obesity and its comorbidities, such as cardiovascular diseases and fertility  
269 abnormalities, future studies will be important to determine the impact of multigenerational  
270 ancestor exposure on the development of obesity-associated comorbidities.

271 In conclusion, environmentally induced epigenetic modifications in germlines would contribute  
272 to the environmental adaptation and evolution of animal species. In the future, it will be  
273 important to assess how each epigenetic vector for inheritance interacts together to modulate  
274 the embryonic epigenome.

## 275 **Materials and Methods**

### 276 *Mice*

277 All mouse experiments were performed with C57BL/6J mice obtained from Charles River  
278 (Charles River Laboratories, France). All mice were housed in a temperature-controlled system  
279 and maintained on a 12-h light/dark cycle (lights on at 7 a.m.). Experimental mice were given  
280 *ad libitum* access to either a high-fat high-sugar diet (WD) (235 HF 45% of energy from fat,  
281 SAFE, France) or a control diet (CD) (SAFE A04, 5% of energy from fat, SAFE, France) and  
282 sterile water. To evaluate the impact of the diet of paternal ancestors on metabolic health, we  
283 developed two experimental models. On the one hand, WD feeding was maintained for 5  
284 successive generations through the paternal line. Briefly, ten 3-week-old male mice were  
285 divided into 2 groups. Males from the first group were kept on CD, and the males of the other  
286 group were fed a WD for 3-4 months. This first generation of WD males was named WD1. At  
287 four months old, 4 to 6 independent males of each group were then crossed with 7-week-old  
288 C57BL/6J female mice (CD-fed) obtained from Charles River (Charles River Laboratories,  
289 France). The male progenies were kept and subjected to the same experimental procedure.  
290 At 3 weeks old, they were fed a WD and at 4-5 months crossed with CD-fed females. This  
291 second generation of males was called WD2. This experimental design was repeated 3 times  
292 to obtain the WD5 group (**Fig 1A**). On the other hand, half of the WD1 and WD5 male and  
293 female progenies were fed a CD. The first generation was called F1-WD1 and F1-WD5,  
294 respectively. The F1 4-month-old male progenies were crossed with 7-week-old C57BL/6J  
295 female mice (CD-fed) to obtain the F2-WD1 and F2-WD5 progenies (**Fig 3A**). This  
296 experimental design was repeated once to obtain the F3-WD1 and F5-WD5 progenies.  
297 The complete experimental design was performed twice at approximately 6 months' interval.  
298 To evaluate the role of sperm RNAs in transgenerational epigenetic inheritance of metabolic  
299 alterations, sperm RNAs extracted from 2 different CD, WD1 and WD5 males were  
300 microinjected into zygotes at the Center for Transgenic Models (University of Basel,  
301 Switzerland) following the same procedure as described in [4]. The resulting progenies were  
302 called F1-RNA-CD, F1-RNA-WD1 and F1-RNA-WD5 progenies, respectively. F2-RNA and F3-

303 RNA progenies were obtained after crossing F1-RNA and F2-RNA 4-month-old males,  
304 respectively, with 7-week-old C57BL/6J female mice (CD-fed) obtained from Charles River  
305 **(Fig 4A)**.

306 All mouse experiments were conducted in accordance with the French and European  
307 legislations for the care and use of research animals.

#### 308 *Body weight and food intake*

309 Body weights were measured every week from weaning until 5 months of age. Daily food  
310 consumption was estimated by weighing the remaining food every week.

311 For organ measurement, 5-month-old mice were anesthetized with sodium pentobarbital and  
312 rapidly dissected. Then, gonadal WAT, inguinal subcutaneous WAT, epididymis, liver and  
313 kidneys were carefully isolated, cleaned of unrelated materials and weighed. One part was  
314 fixed in 4% PFA, and the other portion was snap frozen in liquid nitrogen.

#### 315 *Blood metabolic parameter measurements*

316 Blood metabolic parameters were detected under different physiological conditions, i.e., a  
317 random-fed state and a 16-h fasted state. Whole-blood glucose levels were determined using  
318 the OneTouch Vita (LifeScan, Johnson & Johnson company) system from tail blood. For  
319 plasma preparation, the blood was collected from the orbital sinus into sterile 1.5-ml tubes  
320 containing 2 drops of citrate sodium (3 M) and mixed gently. Blood cells were removed by  
321 centrifugation at 2000xg for 10 min at 4°C, and the resulting supernatant was immediately  
322 aliquoted and stored at -80°C. Serum CRP, leptin, adiponectin and cholesterol levels were  
323 measured with the C-Reactive Protein ELISA (Mouse CRP, Elabscience, CliniSciences S.A.S.,  
324 Nanterre, France), Leptin ELISA (ASSAYPRO, CliniSciences S.A.S., Nanterre, France),  
325 Adiponectin ELISA (mouse Adiponectin, EZMADP-60K, EMD Millipore Corporation,  
326 Darmstadt, Germany) and Cholesterol Assay (Abcam, Paris, France) kits, respectively. All  
327 measurements were performed in accordance with the manufacturers' instructions.

#### 328 *Glucose and insulin tolerance tests*

329 Mice were placed in new cages prior to starvation. For GTTs, 12-h fasted mice were injected  
330 i.p. with a solution of sterile glucose (2 g/kg body weight) freshly prepared in 0.9% sterile saline.  
331 For ITTs, 6-h fasted mice were injected i.p. with insulin diluted to 0.08 mU/μl in sterile saline  
332 for a final delivery of 0.8 mU/g body weight. Baseline glucose measurements were analyzed  
333 from tail blood before i.p. glucose or insulin injection (2 mg/g body weight) using the OneTouch  
334 Vita (LifeScan, Johnson & Johnson company) system. Blood glucose measurements were  
335 taken from the tail blood at the indicated points.

### 336 *gWAT morphometry staining*

337 gWAT was fixed with Antigenfix (Microm Microtech, France), embedded in paraffin, sectioned  
338 and stained with a hematoxylin and eosin solution. Slides (4/group) were scanned with Axio-  
339 scan, which allowed the scanning of the entire slide at high resolution. Six pictures of six  
340 different areas from 1–2 sections per sample were chosen and analyzed with image analyzer  
341 software (ImageJ). Total areas of adipocytes were traced manually. The total count ranged  
342 from 3275 to 7052 adipocytes per condition. The mean surface area of the adipocytes was  
343 calculated using image analyzer software (ImageJ). For each sample, 400–1000 adipocytes  
344 were counted.

### 345 *Estimation of adipocyte number in gWAT*

346 To estimate the number of adipocytes in gWAT depots, we applied a mathematical equation  
347 developed by Jo and colleagues[32], as previously described in [20]. Briefly, the number of  
348 adipocytes (N) was estimated by dividing the WAT mass (M) by the density of adipocytes (D  
349 = 915 g/L) multiplied by the mean volume of adipocytes within the WAT (V). The mean volume  
350 of adipocytes is calculated from the mean diameters of adipocytes, extracted from tissue  
351 sections images. The equation is presented below:

$$352 \quad N = \frac{M}{\left(D \times \frac{4}{3} \times \pi r^3\right)}$$

### 353 *Computed tomography of mice*

354 Anesthetized animals were placed in a SkyScan  $\mu$ CT-1178 X-ray tomograph (Bruker) and  
355 analyzed as previously described[33]. Mice were scanned using the following parameters: 104  
356  $\mu$ m pixel size, 49 kV, 0.5-mm-thick aluminum filter and a rotation step of 0.9°. 3D  
357 reconstructions and analysis of whole abdominal fat were performed using NRecon and CTAn  
358 software (Skyscan), respectively, between thoracic 13 and sacral 4 vertebral markers.

#### 359 *Liver triglyceride Measurement*

360 Frozen small piece of liver was placed in 2ml tubes with Ceramic Beads (for Precellys  
361 homogenizer) and were homogenized in Sodium Acetate (0.2M, pH4.5) using the Precellys  
362 homogenizer. After centrifugation, the supernatant was stored at -80°C. The TG in  
363 homogenates was measured according to the reagent kit instruction (Triglycerides FS - DiaSys  
364 Diagnostic Systems GmbH, Holzheim, Germany).

#### 365 *Histological liver examination*

366 The livers were prepared and fixed in 4% paraformaldehyde, embedded in paraffin, cut into 5-  
367  $\mu$ m-thick slices, stained with haematoxylin and eosin (H&E), mounted with neutral resins and  
368 then scanned with Axio-scan, which allowed the scanning of the entire slide at high resolution.  
369 Liver histology was blindly evaluated by two independent analysts using a semiquantitative  
370 scale adapted from previously validated procedures [34]. To that end, images from three  
371 different fields in each section were collected at 20x magnification and numbers of normal  
372 hepatocytes, microvesicular and macrovesicular steatosis and degenerating hepatocytes was  
373 assessed.

#### 374 *Sperm collection*

375 Sperm were collected from the epididymis by squeezing. The cell suspension was centrifuged  
376 at 1000 rpm for 5 min, and the supernatant containing the spermatozoa was centrifuged at  
377 3000 rpm for 15 min. To reduce contamination of somatic cells, the pellet was submitted to

378 hypotonic shock by resuspension in water (250  $\mu$ l), followed by the addition of 15 ml of PBS.

379 The suspension was finally centrifuged at 3000 rpm for 15 min.

### 380 *Quantitative RT-PCR*

381 Total RNA from epididymal adipose tissues was extracted using TRIzol reagent (Life  
382 Technologies, France) according to the manufacturer's instructions. Total RNA (0.5  $\mu$ g) was  
383 reverse transcribed with mouse myeloblastosis virus reverse transcriptase (Promega) under  
384 standard conditions using hexanucleotide random primers according to the manufacturer's  
385 instructions. cDNA was amplified by PCR with specific primers. Real-time PCR was performed  
386 on the Light Cycler Instrument (Roche Diagnostics) using the Platinum SYBR Green kit  
387 (Invitrogen). Specific primers for mouse leptin and 2 mouse housekeeping genes used for  
388 normalization ( *$\beta$ -actin* and *34B4* mouse genes) were purchased from Sigma (Sigma, France).  
389 We used primers for *Leptin* (forward, AAC CTG GAA ATG CTC TGG CTGT; reverse, ACT  
390 CGC TGT GAA TGG CCT GAA A), *36B4F* (forward, TCC AGG CTT TGG GCA TCA; reverse,  
391 CTT TAT CAG CTG CAC ATC ACT CAG A), and  *$\beta$ -actin* (forward, CTA AGG CCA ACC GTG  
392 AAA AG; reverse, CCT GCT TCA CCA CCT TCT TG).

### 393 *RNA preparation and microinjection*

394 Frozen sperm were stored at -80°C. RNA was then extracted by the TRIzol procedure  
395 (Invitrogen). The same preparations of sperm RNAs were used for microinjection and small  
396 RNA sequencing. RNA preparations were verified by spectrometry on an Agilent Bioanalyzer  
397 2100 apparatus. Microinjection into fertilized eggs was performed as described in [25]. RNA  
398 solutions were adjusted to a concentration of 1-2  $\mu$ g/ml, and 1-2 pl were microinjected into the  
399 pronucleus of C57BL/6 fertilized mouse oocytes.

### 400 *Library preparation and sequencing*

401 Total RNA was isolated from gonadal adipose tissue (eWAT; n = 9) samples using the Ambion  
402 RiboPure (Thermo Fisher Scientific). RNA was quantified in a Nanodrop ND-1000  
403 spectrophotometer and RNA purity and integrity was checked by using a Bioanalyzer-2100



404 equipment (Agilent Technologies, INC., Santa Clara, CA). Libraries were prepared using the  
405 TruSeq RNA Sample Preparation Kit (Illumina Inc., CA) and were paired-end sequenced (2 ×  
406 75 bp), by using the TruSeq SBS Kit v3-HS (Illumina Inc., CA), in a HiSeq 2000 platform  
407 (Illumina Inc., CA). More than 30 M PE reads were obtained for all samples.

#### 408 *Transcriptomics analysis (RNA-sequencing analysis)*

409 Raw sequence files were subjected to quality control analysis using FastQC. In order to avoid  
410 low quality data, adapters were removed by Cutadapt and lower quality bases were trimmed  
411 by trimmomatic [35]. The quality-checked reads processed were mapped to the mouse  
412 reference genome GRCm38/mm10 using STAR [36]. Reads abundance was evaluated for  
413 each gene followed by annotation versus mouse GTF by using the feature Counts function.  
414 The R package Edger was used in order to normalize the reads and to identify differentially  
415 expressed (DE) genes [37]. Genes with FDR < 0.05 after correcting for multiple testing were  
416 classified as DE [38]. The pheatmap and VolcanoPlot functions (R packages) were used to  
417 graphically represent the expression levels (log2FC) and significance of DE genes among  
418 treatments. These experiments have been deposited in the GEO Database with accession  
419 number (GSE148972) and a review access token (ovwzywcnpublor).

#### 420 *Small RNA-sequencing analysis: Analysis of differential expression*

421 The experiment was carried out in triplicate. RNA libraries were prepared starting from 50-100  
422 ng of total RNA from individual mice (n=3 per group, 3 groups in total) and constructed using  
423 the Illumina TruSeq Stranded Small RNA Sequencing kit (Illumina) according to the  
424 manufacturer's instructions. Sequencing was performed at the IPMC platform (Sophia-  
425 Antipolis, France) using the HiSeq 2500 (Illumina).

426 Read quality was assessed using FastQC and trimmed, against known common Illumina  
427 adapter/primer sequences, using trimmomatic. The SmallIRNAs IPMC pipeline with Illumina  
428 adaptor trimming was used, read sizes < 15 b were discarded. Reads kept were mapped to  
429 the mouse genome GRCm38/mm10 by using bowtie2 (--local --very-sensitive-local -k 24).  
430 Reads abundance was evaluated for each gene followed by annotation versus gff mirbase

431 v21, ensembl ncrna rel73, tRNAs and piRNA clusters from piRNAclusterDB. Normalization of  
432 reads abundance and differential expression analysis was performed by using DESeq R  
433 package. The baseMean for each gene, the maximum of mean counts among all conditions,  
434 was at least 50 counts. NGS experiments have been deposited in the GEO Database with  
435 accession number (GSE138989).

#### 436 *Statistics and reproducibility*

437 Statistical analyses were performed using the Kruskal-Wallis test followed by the two-stage  
438 step-up method of Benjamini, Krieger and Yekuteil for multiple comparisons of body weight,  
439 body composition, cholesterol, and leptin levels, as well as leptin mRNA expression and AUC-  
440 GTT and AUC-ITT between the WD cohorts, F1-, F2-, and F3-progenies and RNA-  
441 microinjected progenies.

442 To measure the linear relationship between two variables, we used Spearman's correlation  
443 coefficient. All statistical analyses were performed with Prism 7 for Mac OS X software  
444 (GraphPad software, Inc.). Data are presented as the median  $\pm$  SD. A  $p$  value of  $<0.05$  was  
445 considered statistically significant.

446 Sample size and replicates are indicated in the figure legends. The WD cohort and WD  
447 progenies were repeated twice.

#### 448 **Acknowledgments**

449 We are grateful to Dr Jean-Jacques Remy for his careful help from the start of this project. We  
450 thank Dr Mireille Cormont, Sofia Fazio, Dr Maria Stathopoulou and Dr Claire Mauduit for  
451 constructive discussions. We thank Marion Dussot for her technical assistance in performing  
452 the liver biochemistry. We relied on sequencing data generated by the IPMC Functional  
453 Genomics Facility (UCAGenomiX - IPMC platform (Sophia-Antipolis, France)). We thank the  
454 Center for Transgenic Models (University of Basel, Switzerland) for the mouse microinjection  
455 assays. We are grateful to the C3M mouse facility (U1065, Nice). This work has been  
456 supported by ANR (grant# ANR-12-ADAPT-0022) and the FFAS "Fonds Français pour  
457 l'Alimentation et la Santé "(15D52) and was partly supported by research funding from the

458 Canceropôle PACA, Institut National du Cancer and Région Sud. F.S. was supported by the  
459 UCA-IDEX.

## 460 References

- 461 1. Chen Q, Yan M, Cao Z, Li X, Zhang Y, Shi J, et al. Sperm tsRNAs contribute to  
462 intergenerational inheritance of an acquired metabolic disorder. *Science*. 2016;351(6271):397-  
463 400. Epub 2016/01/02. doi: 10.1126/science.aad7977. PubMed PMID: 26721680.
- 464 2. Fullston T, Ohlsson Teague EM, Palmer NO, DeBlasio MJ, Mitchell M, Corbett M, et  
465 al. Paternal obesity initiates metabolic disturbances in two generations of mice with incomplete  
466 penetrance to the F2 generation and alters the transcriptional profile of testis and sperm  
467 microRNA content. *Faseb j*. 2013;27(10):4226-43. Epub 2013/07/13. doi: 10.1096/fj.12-  
468 224048. PubMed PMID: 23845863.
- 469 3. Grandjean V, Fourre S, De Abreu DA, Derieppe MA, Remy JJ, Rassoulzadegan M.  
470 RNA-mediated paternal heredity of diet-induced obesity and metabolic disorders. *Sci Rep*.  
471 2015;5:18193. Epub 2015/12/15. doi: 10.1038/srep18193. PubMed PMID: 26658372; PubMed  
472 Central PMCID: PMC4677355.
- 473 4. Gapp K, Jawaid A, Sarkies P, Bohacek J, Pelczar P, Prados J, et al. Implication of  
474 sperm RNAs in transgenerational inheritance of the effects of early trauma in mice. *Nat*  
475 *Neurosci*. 2014;17(5):667-9. doi: 10.1038/nn.3695. PubMed PMID: 24728267.
- 476 5. Portha B, Grandjean V, Movassat J. Mother or Father: Who Is in the Front Line?  
477 Mechanisms Underlying the Non-Genomic Transmission of Obesity/Diabetes via the Maternal  
478 or the Paternal Line. *Nutrients*. 2019;11(2). Epub 2019/01/27. doi: 10.3390/nu11020233.  
479 PubMed PMID: 30678214.
- 480 6. Remy JJ. Stable inheritance of an acquired behavior in *Caenorhabditis elegans*.  
481 *Current biology : CB*. 2010;20(20):R877-8. Epub 2010/10/26. doi: 10.1016/j.cub.2010.08.013.  
482 PubMed PMID: 20971427.
- 483 7. Skinner MK, Guerrero-Bosagna C, Haque MM. Environmentally induced epigenetic  
484 transgenerational inheritance of sperm epimutations promote genetic mutations. *Epigenetics*.  
485 2015;10(8):762-71. Epub 2015/08/04. doi: 10.1080/15592294.2015.1062207. PubMed PMID:  
486 26237076; PubMed Central PMCID: PMC4622673.
- 487 8. Agarwal A, Majzoub A. Free Radicals in Andrology. Jannini AA, Maggi M, Foresta C,  
488 Lenzi A, editors2017.
- 489 9. Carone BR, Fauquier L, Habib N, Shea JM, Hart CE, Li R, et al. Paternally induced  
490 transgenerational environmental reprogramming of metabolic gene expression in mammals.  
491 *Cell*. 2010;143(7):1084-96. Epub 2010/12/25. doi: 10.1016/j.cell.2010.12.008. PubMed PMID:  
492 21183072; PubMed Central PMCID: PMC3039484.
- 493 10. Soubry A. POHaD: why we should study future fathers. *Environmental epigenetics*.  
494 2018;4(2):dvy007. Epub 2018/05/08. doi: 10.1093/eep/dvy007. PubMed PMID: 29732171;  
495 PubMed Central PMCID: PMC5920283.
- 496 11. de Castro Barbosa T, Ingerslev LR, Alm PS, Verstehe S, Massart J, Rasmussen M,  
497 et al. High-fat diet reprograms the epigenome of rat spermatozoa and transgenerationally  
498 affects metabolism of the offspring. *Molecular metabolism*. 2016;5(3):184-97. Epub  
499 2016/03/16. doi: 10.1016/j.molmet.2015.12.002. PubMed PMID: 26977389; PubMed Central  
500 PMCID: PMC4770269.
- 501 12. Ge ZJ, Liang QX, Hou Y, Han ZM, Schatten H, Sun QY, et al. Maternal obesity and  
502 diabetes may cause DNA methylation alteration in the spermatozoa of offspring in mice.  
503 *Reprod Biol Endocrinol*. 2014;12:29. Epub 2014/04/12. doi: 10.1186/1477-7827-12-29.  
504 PubMed PMID: 24721882; PubMed Central PMCID: PMC3984639.
- 505 13. Ost A, Lempradl A, Casas E, Weigert M, Tiko T, Deniz M, et al. Paternal diet defines  
506 offspring chromatin state and intergenerational obesity. *Cell*. 2014;159(6):1352-64. Epub  
507 2014/12/07. doi: 10.1016/j.cell.2014.11.005. PubMed PMID: 25480298.
- 508 14. Terashima M, Barbour S, Ren J, Yu W, Han Y, Muegge K. Effect of high fat diet on  
509 paternal sperm histone distribution and male offspring liver gene expression. *Epigenetics*.

- 510 2015;10(9):861-71. Epub 2015/08/08. doi: 10.1080/15592294.2015.1075691. PubMed PMID:  
511 26252449; PubMed Central PMCID: PMCPMC4622005.
- 512 15. Sharma U, Conine CC, Shea JM, Boskovic A, Derr AG, Bing XY, et al. Biogenesis and  
513 function of tRNA fragments during sperm maturation and fertilization in mammals. *Science*.  
514 2016;351(6271):391-6. Epub 2016/01/02. doi: 10.1126/science.aad6780. PubMed PMID:  
515 26721685.
- 516 16. Cropley JE, Eaton SA, Aiken A, Young PE, Giannoulatou E, Ho JW, et al. Male-lineage  
517 transmission of an acquired metabolic phenotype induced by grand-paternal obesity.  
518 *Molecular metabolism*. 2016;5(8):699-708. Epub 2016/09/23. doi:  
519 10.1016/j.molmet.2016.06.008. PubMed PMID: 27656407; PubMed Central PMCID:  
520 PMCPMC5021672.
- 521 17. Huypens P, Sass S, Wu M, Dyckhoff D, Tschop M, Theis F, et al. Epigenetic germline  
522 inheritance of diet-induced obesity and insulin resistance. *Nat Genet*. 2016;48(5):497-9. Epub  
523 2016/03/15. doi: 10.1038/ng.3527. PubMed PMID: 26974008.
- 524 18. Massiera F, Barbry P, Guesnet P, Joly A, Luquet S, Moreilhon-Brest C, et al. A  
525 Western-like fat diet is sufficient to induce a gradual enhancement in fat mass over  
526 generations. *J Lipid Res*. 2010;51(8):2352-61. Epub 2010/04/23. doi: 10.1194/jlr.M006866.  
527 PubMed PMID: 20410018; PubMed Central PMCID: PMC2903802.
- 528 19. Liberzon A. A description of the Molecular Signatures Database (MSigDB) Web site.  
529 *Methods Mol Biol*. 2014;1150:153-60. Epub 2014/04/20. doi: 10.1007/978-1-4939-0512-6\_9.  
530 PubMed PMID: 24743996.
- 531 20. Gilleron J, Bouget G, Ivanov S, Meziat C, Ceppo F, Vergoni B, et al. Rab4b Deficiency  
532 in T Cells Promotes Adipose Treg/Th17 Imbalance, Adipose Tissue Dysfunction, and Insulin  
533 Resistance. *Cell Rep*. 2018;25(12):3329-41.e5. Epub 2018/12/20. doi:  
534 10.1016/j.celrep.2018.11.083. PubMed PMID: 30566860.
- 535 21. Lecoutre S, Oger F, Pourpe C, Butruille L, Marousez L, Dickes-Coopman A, et al.  
536 Maternal obesity programs increased leptin gene expression in rat male offspring via  
537 epigenetic modifications in a depot-specific manner. *Molecular metabolism*. 2017;6(8):922-30.  
538 Epub 2017/07/29. doi: 10.1016/j.molmet.2017.05.010. PubMed PMID: 28752055; PubMed  
539 Central PMCID: PMCPMC5518658.
- 540 22. Masuyama H, Mitsui T, Eguchi T, Tamada S, Hiramatsu Y. The effects of paternal high-  
541 fat diet exposure on offspring metabolism with epigenetic changes in the mouse adiponectin  
542 and leptin gene promoters. *Am J Physiol Endocrinol Metab*. 2016;311(1):E236-45. Epub  
543 2016/06/02. doi: 10.1152/ajpendo.00095.2016. PubMed PMID: 27245335.
- 544 23. Schierwagen R, Maybuchen L, Zimmer S, Hittatiya K, Back C, Klein S, et al. Seven  
545 weeks of Western diet in apolipoprotein-E-deficient mice induce metabolic syndrome and non-  
546 alcoholic steatohepatitis with liver fibrosis. *Sci Rep*. 2015;5:12931. Epub 2015/08/12. doi:  
547 10.1038/srep12931. PubMed PMID: 26263022; PubMed Central PMCID: PMCPMC4531783.
- 548 24. Breyer MD, Bottinger E, Brosius FC, 3rd, Coffman TM, Harris RC, Heilig CW, et al.  
549 Mouse models of diabetic nephropathy. *J Am Soc Nephrol*. 2005;16(1):27-45. Epub  
550 2004/11/26. doi: 10.1681/asn.2004080648. PubMed PMID: 15563560.
- 551 25. Sarker G, Sun W, Rosenkranz D, Pelczar P, Opitz L, Efthymiou V, et al. Maternal  
552 overnutrition programs hedonic and metabolic phenotypes across generations through sperm  
553 tsRNAs. *Proc Natl Acad Sci U S A*. 2019;116(21):10547-56. Epub 2019/05/08. doi:  
554 10.1073/pnas.1820810116. PubMed PMID: 31061112; PubMed Central PMCID:  
555 PMCPMC6534971.
- 556 26. Golay A, Ybarra J. Link between obesity and type 2 diabetes. *Best practice & research*  
557 *Clinical endocrinology & metabolism*. 2005;19(4):649-63. Epub 2005/11/29. doi:  
558 10.1016/j.beem.2005.07.010. PubMed PMID: 16311223.
- 559 27. Kumar R, Priyadarshi RN, Anand U. Non-alcoholic Fatty Liver Disease: Growing  
560 Burden, Adverse Outcomes and Associations. *J Clin Transl Hepatol*. 2020;8(1):76-86. Epub  
561 2020/04/11. doi: 10.14218/jcth.2019.00051. PubMed PMID: 32274348; PubMed Central  
562 PMCID: PMCPMC7132013.

- 563 28. Kranz AM, Forgan LG, Cole GL, Endler JA. Light environment change induces  
564 differential expression of guppy opsins in a multi-generational evolution experiment. *Evolution*.  
565 2018. Epub 2018/06/20. doi: 10.1111/evo.13519. PubMed PMID: 29920667.
- 566 29. Jegede OO, Hale BA, Siciliano SD. Multigenerational exposure of populations of *Oppia*  
567 *nitens* to zinc under pulse and continuous exposure scenarios. *Environ Toxicol Chem*.  
568 2019;38(4):896-904. Epub 2019/01/25. doi: 10.1002/etc.4369. PubMed PMID: 30675922.
- 569 30. Horan TS, Marre A, Hassold T, Lawson C, Hunt PA. Germline and reproductive tract  
570 effects intensify in male mice with successive generations of estrogenic exposure. *PLoS*  
571 *Genet*. 2017;13(7):e1006885. Epub 2017/07/21. doi: 10.1371/journal.pgen.1006885. PubMed  
572 PMID: 28727826; PubMed Central PMCID: PMC5519010.
- 573 31. Hardikar AA, Satoor SN, Karandikar MS, Joglekar MV, Puranik AS, Wong W, et al.  
574 Multigenerational Undernutrition Increases Susceptibility to Obesity and Diabetes that Is Not  
575 Reversed after Dietary Recuperation. *Cell Metab*. 2015;22(2):312-9. Epub 2015/07/15. doi:  
576 10.1016/j.cmet.2015.06.008. PubMed PMID: 26166746.
- 577 32. Jo J, Gavrilova O, Pack S, Jou W, Mullen S, Sumner AE, et al. Hypertrophy and/or  
578 Hyperplasia: Dynamics of Adipose Tissue Growth. *PLoS Comput Biol*. 2009;5(3):e1000324.  
579 Epub 2009/03/28. doi: 10.1371/journal.pcbi.1000324. PubMed PMID: 19325873; PubMed  
580 Central PMCID: PMC2653640.
- 581 33. Beranger GE, Pisani DF, Castel J, Djedaini M, Battaglia S, Amiaud J, et al. Oxytocin  
582 reverses ovariectomy-induced osteopenia and body fat gain. *Endocrinology*.  
583 2014;155(4):1340-52. Epub 2014/02/11. doi: 10.1210/en.2013-1688. PubMed PMID:  
584 24506069.
- 585 34. Kleiner DE, Brunt EM, Van Natta M, Behling C, Contos MJ, Cummings OW, et al.  
586 Design and validation of a histological scoring system for nonalcoholic fatty liver disease.  
587 *Hepatology*. 2005;41(6):1313-21. Epub 2005/05/26. doi: 10.1002/hep.20701. PubMed PMID:  
588 15915461.
- 589 35. Bolger AM, Lohse M, Usadel B. Trimmomatic: a flexible trimmer for Illumina sequence  
590 data. *Bioinformatics*. 2014;30(15):2114-20. Epub 2014/04/04. doi:  
591 10.1093/bioinformatics/btu170. PubMed PMID: 24695404; PubMed Central PMCID:  
592 PMC4103590.
- 593 36. Dobin A, Davis CA, Schlesinger F, Drenkow J, Zaleski C, Jha S, et al. STAR: ultrafast  
594 universal RNA-seq aligner. *Bioinformatics*. 2013;29(1):15-21. Epub 2012/10/30. doi:  
595 10.1093/bioinformatics/bts635. PubMed PMID: 23104886; PubMed Central PMCID:  
596 PMC3530905.
- 597 37. McCarthy DJ, Chen Y, Smyth GK. Differential expression analysis of multifactor RNA-  
598 Seq experiments with respect to biological variation. *Nucleic Acids Res*. 2012;40(10):4288-97.  
599 Epub 2012/01/31. doi: 10.1093/nar/gks042. PubMed PMID: 22287627; PubMed Central  
600 PMCID: PMC3378882.
- 601 38. Love MI, Huber W, Anders S. Moderated estimation of fold change and dispersion for  
602 RNA-seq data with DESeq2. *Genome Biol*. 2014;15(12):550. Epub 2014/12/18. doi:  
603 10.1186/s13059-014-0550-8. PubMed PMID: 25516281; PubMed Central PMCID:  
604 PMC4302049.

605

606

## 607 **Author Contributions**

608 V.G. conceived and designed the project. V.G., G.R., J.G., V.C.M., D.P., E.Z.A. and M.A.D.

609 performed the experiments. V.G. wrote the manuscript. F.S., G.R., J.G., E.Z.A and F.S.

610 contributed to the data analysis. E.Z.A., D.P.V., C.M., F.S., G.R., L.M. and M.T. edited the  
611 paper. All of the authors read and approved the final manuscript.

612 **Competing Interest Statement**

613 The authors declare no competing interests.

614

615 **Table 1. Evolution of serum biomarker parameters in different WD groups**

| Parameters                | Control<br>n=6 | WD1<br>n=4       | WD2<br>n=5 | WD3<br>n=7         | WD4<br>n=7           | WD5<br>n=7           |
|---------------------------|----------------|------------------|------------|--------------------|----------------------|----------------------|
| Adiponectin (μg/ml)       | 44.31±10       | 51.16±20         | 37.30±9    | 40.25±15           | 3542±698             | 43.90±11             |
| Leptin (μg/ml)            | 6.4±1.6        | 11.1±4.5         | 9.2±3.9    | 15.8.55±9.75       | <b>19.9±9.98**\$</b> | <b>17±19.8**\$</b>   |
| CRP (ng/ml)               | 3896±1223      | 5694±585         | 5787±459   | <b>7723±2050**</b> | <b>5813±1840*</b>    | <b>6567±1036**</b>   |
| Total cholesterol (mg/dl) | 0.9±0.2        | <b>1.5±0.4**</b> | 1.33±0.39  | <b>1.8±0.2*</b>    | <b>1.8±0.3***\$</b>  | <b>1.4±0.33***\$</b> |

616 Values are expressed as the mean ± SD. Kruskal-Wallis test, a rank-based nonparametric test  
617 for multiple comparisons, two-stage linear step-up procedure of Benjamin, Krieger and  
618 Yekutieli was used to calculate the *p* value. Numbers are in bold if *p*<0.05. \$ denoted the WD  
619 groups whose median was significantly different from that of the WD2 group. \**p*<0.05,  
620 \*\**p*<0.01.

621

## 622 Figure Legends

623 **Fig 1. Five consecutive paternal generations of WD feeding exacerbate the WD-induced**  
624 **overweight phenotype.**

625 (A) Study design for the maintenance of WD feeding for 5 consecutive generations through  
626 the paternal lineage. Male mice were randomized to receive either a control diet (CD; 5% of  
627 energy from fat) or a high-fat diet (WD1; 45% of energy from fat) for 3 months before being  
628 mated with CD-fed females to generate WD2 offspring. Five independent WD2 males fed a  
629 WD for 3 months were mated with CD-fed females to generate WD3 offspring. The same  
630 procedure was repeated twice to generate the WD4 and WD5 offspring. (B) Box-whiskers (min-  
631 max) of the median total body weight of the different male WD cohorts (n≥8 mice per group).  
632 (C) Box-whiskers (min-max) of the median perigonadal white adipose tissue (gWAT) weight  
633 relative to total body weight in the different WD cohorts. (D) H&E staining of gWAT sections  
634 (scale bar: 200 μm) in representative CD, WD1, WD4 and WD5 males. (E) Box-whiskers (min-  
635 max) of the median surface area (μm<sup>2</sup>) of the adipocytes, which was calculated using Image  
636 Analyzer software (ImageJ). The total count ranged from 3275 to 7052 cells per condition (n≥4  
637 mice per group). (F) Box-whiskers (min-max) of the number of adipocytes which was estimated

638 using the mathematical equation developed by Jo et al.[32], as previously described in [20]. **g**,  
639 Table showing the differentially expressed genes (DEGs) in WD1 and WD5 perigonadal white  
640 adipose tissue. (H) Heatmap diagrams of DEGs ( $p < 0.01$   $\log_2FC \geq |0.6|$ ) in both WD1 and WD5  
641 perigonadal white adipose tissue compared to expression in the CD gWAT tissue cohort.  
642 Negative log-ratios (log fold change) are shown in green, while positive log-ratios are shown  
643 in red. Genes that are differentially expressed in both WD1 and WD5 are deregulated in the  
644 same way ( $n=3$  mice/group).

645 \* $p < 0.05$ , \*\* $p < 0.01$ , \*\*\* $p < 0.001$  (the Kruskal-Wallis test, a rank-based nonparametric test for  
646 multiple comparisons, two-stage linear step-up procedure of Benjamin, Krieger and Yekutieli  
647 was used to calculate the adjusted  $p$  value). § denotes the WD groups whose median was  
648 significantly different from that of the WD1 cohort.

649 **Fig 2. Five consecutive paternal generations of WD feeding exacerbate WD-induced**  
650 **overweight pathologies.**

651 (A-B) Evolution of glucose parameters in male mice fed a WD for five successive generations.  
652 Blood glucose and insulin tolerance tests were performed on 16-week-old males ( $n \geq 6$ ). Plasma  
653 glucose [inserted box-whiskers (min-max) of the median area under the curve (AUC) and  
654 above baseline for glucose from time point 0 to 120; glucose tolerance test] (A) [inserted box-  
655 whiskers (min-max) of the median AUC and above baseline for glucose from time point 0 to  
656 100; insulin tolerance test] (B). Glucose tolerance and insulin tolerance tests were conducted  
657 in the morning in overnight-fasted mice. **c** Box-whiskers (min-max) of the median liver weight  
658 relative to total body weight in the different WD cohorts ( $n \geq 8$  mice per group). (D) Liver  
659 triglyceride contents in the CD, WD1 and WD5 groups ( $n \geq 6$ ). (E) Percentage of normal  
660 hepatocytes (black boxes), hepatocytes with microvesicular steatosis (gray boxes) and  
661 hepatocytes with macrovesicular steatosis (pink boxes) in CD, WD1 and WD5 livers ( $n \geq 6$ ). (F)  
662 H&E staining of liver sections (scale bar: 250  $\mu\text{m}$ ) from representative CD, WD1 and WD5  
663 males.



664 \* $p < 0.05$ , \*\* $p < 0.01$ , \*\*\* $p < 0.001$  (the Kruskal-Wallis test, a rank-based nonparametric test for  
665 multiple comparisons, two-stage linear step-up procedure of Benjamin, Krieger and Yekutieli  
666 was used to calculate the adjusted  $p$  value). § denotes the WD groups whose median was  
667 significantly different from that of the WD1 cohort.

668 **Fig 3. Maintenance of the overweight phenotype after 4 generations on the CD in the**  
669 **progenies generated from WD5-fed males.**

670 (A) Study design for the inheritance of WD-induced metabolic alterations in WD1- and WD5-  
671 fed animals. Five WD1 and five WD5 male mice from different littermates fed the control diet  
672 (CD) were mated with CD-fed females to generate F2-WD1 and F2-WD5 offspring,  
673 respectively. Each offspring was fed the CD. This crossing scheme was repeated twice to  
674 obtain the F3-, F4-WD1 and F3-, F4-WD5 offspring. The number of mice is indicated. Box-  
675 whiskers (min-max) of the median total body weights of 18-week-old males (B, D) and females  
676 (F, H) of progenies from WD-fed animals. Box-whiskers (min-max) of the median gWAT of  
677 males (C, E) and females (G, I) of progenies from WD-fed animals.

678 Gray rectangles represent the male and female progenies from WD1-fed animals. Blue and  
679 red dots represent the male and female cohorts, respectively, of progenies from WD5-fed  
680 animals.

681 \* $p < 0.05$ , \*\* $p < 0.01$ , \*\*\* $p < 0.001$  (the Kruskal-Wallis test, a rank-based nonparametric test for  
682 multiple comparisons, two-stage linear step-up procedure of Benjamin, Krieger and Yekutieli  
683 was used to calculate the adjusted  $p$  value).

684 **Fig 4. Zygotic microinjection of sperm total RNA from either WD1 or WD5 males induces**  
685 **metabolic alterations in the F1 and F2 CD-fed progenies that are not maintained in the**  
686 **F3 and F4 CD-fed progenies.**

687 (A) Study design for the inheritance of metabolic alterations induced after the microinjection of  
688 sperm total RNA from CD-, WD1- or WD5-fed males into C57BL/6J zygotes. Five F1 CD-fed  
689 males from each set of RNA microinjections were mated with CD-fed females to generate F2-  
690 RNA offspring. Each offspring was fed a control diet. This crossing scheme was repeated twice

691 to obtain the F3-RNA offspring and then the F4-RNA offspring. (B) Box-whiskers (min-max) of  
692 the median total body weight of the F1-, F2-, F3-, and F4-RNA male progenies ( $n \geq 8$  mice per  
693 group). (C) Box-whiskers (min-max) of the median gWAT weight relative to total body weight  
694 in the different RNA progenies. The evolution of glucose parameters in male mice from RNA-  
695 injected progenies. (D) Box-whiskers (min-max) of the median AUC-GTT of each cohort. (E)  
696 Box-whiskers (min-max) of the median AUC-ITT of each group. (F) Bivariate correlation  
697 between the body weight of the F2-RNA-CD, F2-RNA-WD1 and F2-RNA-WD5 progenies and  
698 the AUC-GTT ( $n=38$ ). This correlation was similar using parametric (Pearson,  $r = 0.4$ ,  $p = 0.01$ )  
699 or nonparametric (Spearman,  $r = 0.4$ ,  $p = 0.01$ ) correlations.

700 \* $p < 0.05$ , \*\* $p < 0.01$ , \*\*\* $p < 0.001$  (the Kruskal-Wallis test, a rank-based nonparametric test for  
701 multiple comparisons, two-stage linear step-up procedure of Benjamin, Krieger and Yekutieli  
702 was used to calculate the adjusted  $p$  value). § denotes the WD groups whose median was  
703 significantly different from that of the WD1 group.

704 **S1 Fig. Exacerbation of the overweight phenotype upon continuous paternal WD**  
705 **feeding for multiple generations.**

706 (A) Evolution of total body weight at 12 and 18 weeks over WD-fed generations ( $n \geq 15$ ). (B)  
707 Positive linear correlation between gWAT and total body weight. Statistically significant  
708 positive linear correlation between gWAT and plasma leptin concentration (C), between gWAT  
709 and plasma total cholesterol (D), between gWAT and plasma CRP concentration (E) and  
710 between plasma leptin concentration and gWAT leptin mRNA (F). (G) There was no  
711 statistically significant linear correlation between epididymal fat mass and AUC-GTT. (H)  
712 Principal component analysis (PCA) analysis of fasting blood glucose, total body weight,  
713 epididymal fat mass and kCal in the different WD cohorts visualizing the pattern of WD males  
714 depending on the number of WD-fed ancestors.

715 **S2 Fig. Long-term epigenetic inheritance of a “healthy” overweight phenotype in CD-**  
716 **fed progenies from WD5 males.**

717 Box-whiskers (min-max) of the median total body weight of the male (A) and female (C) F1-,  
718 F2-, F3-WD progenies ( $n \geq 8$  mice per group). Box-whiskers (min-max) of the median gonadal  
719 fat mass (gWAT) weight relative to total body weight in the male (B) and female (D) F1-, F2-,  
720 F3-WD progenies ( $n \geq 8$  mice per group). The evolution of glucose parameters in CD-fed male  
721 (E, F) and female (G, H) WD progenies. Above the glucose tolerance curves are representative  
722 corresponding box-whiskers (min-max) of the median AUC-GTT of each group (E, G). Above  
723 the insulin tolerance curves are representative corresponding box-whiskers (min-max) of the  
724 median AUC-ITT of each cohort (F, H) measured in each WD cohort.  
725 \* $p < 0.05$ , \*\* $p < 0.01$ , \*\*\* $p < 0.001$  (The Kruskal-Wallis test, a rank-based nonparametric test for  
726 multiple comparisons, two-stage linear step-up procedure of Benjamin, Krieger and Yekutieli  
727 was used to calculate the adjusted  $p$  value). § denotes the WD5 progeny whose median was  
728 significantly different from that of the WD1 corresponding progeny.

729 **S3 Fig. No liver alteration was observed in the CD-fed progenies from WD1 and WD5**  
730 **males.**

731 (A) Liver triglyceride contents in CD, WD1 and WD5 CD-fed progenies. (B) H&E staining of  
732 liver sections (scale bar: 250  $\mu\text{m}$ ) in representative F1, F2, and F3 CD-fed progenies of CD,  
733 WD1 and WD5 males.

734 **S4 Fig. Small RNA-seq analysis of WD1 and WD5 male sperm**

735 (A) Representative bioanalyzer profiles of CD, WD1 and WD5 sperm total RNAs. (B) The  
736 normalized small RNA levels from the CD (blue spots), WD1 (red spots) and WD5 (green  
737 spots) sperm were analyzed by PCA. One WD5 fell outside the PCA cluster and was arbitrarily  
738 removed for differential expression analysis. (C) Venn diagram of small RNA sequences  
739 differentially expressed in WD1 and WD5 sperm. The numbers of small RNAs that are unique  
740 for each WD1 and WD5 male are shown in each circle. The numbers of genes in overlapping  
741 (common) are indicated at the intersections of the sets in the Venn diagram ( $P_{\text{adjvalue}} < 0.05$   
742  $\text{Log}_2\text{FC} \geq |0.6|$ ). Heatmap diagrams of microRNAs (D) or piRNAs, tRNA fragments, and other  
743 small RNAs (E) differentially expressed ( $P_{\text{adjvalue}} < 0.05$   $\text{Log}_2\text{FC} \geq |0.6|$ ) in both WD1 and WD5

744 sperm compared to their expression in the CD sperm cohort. The color green indicates a  
745 negative deregulation, whereas red shows a positive deregulation.

746 CD, chow diet; WD1, male fed a WD for one generation; WD5, male fed a WD for 5 successive  
747 generations.

748 **S5 Fig. No liver alteration was observed in the CD-fed progenies from RNA-WD1 and**  
749 **RNA-WD5 males.**

750 (A) Liver triglyceride contents in F1, F2, and F3 progenies of CD-RNA-, WD1-RNA- and WD5-  
751 RNA-injected groups. (B) H&E staining of liver sections (scale bar: 250  $\mu$ m) in representative  
752 F1, F2 and F3 CD-fed progenies of CD-RNA-, WD1-RNA- and WD5-RNA-injected groups.

753

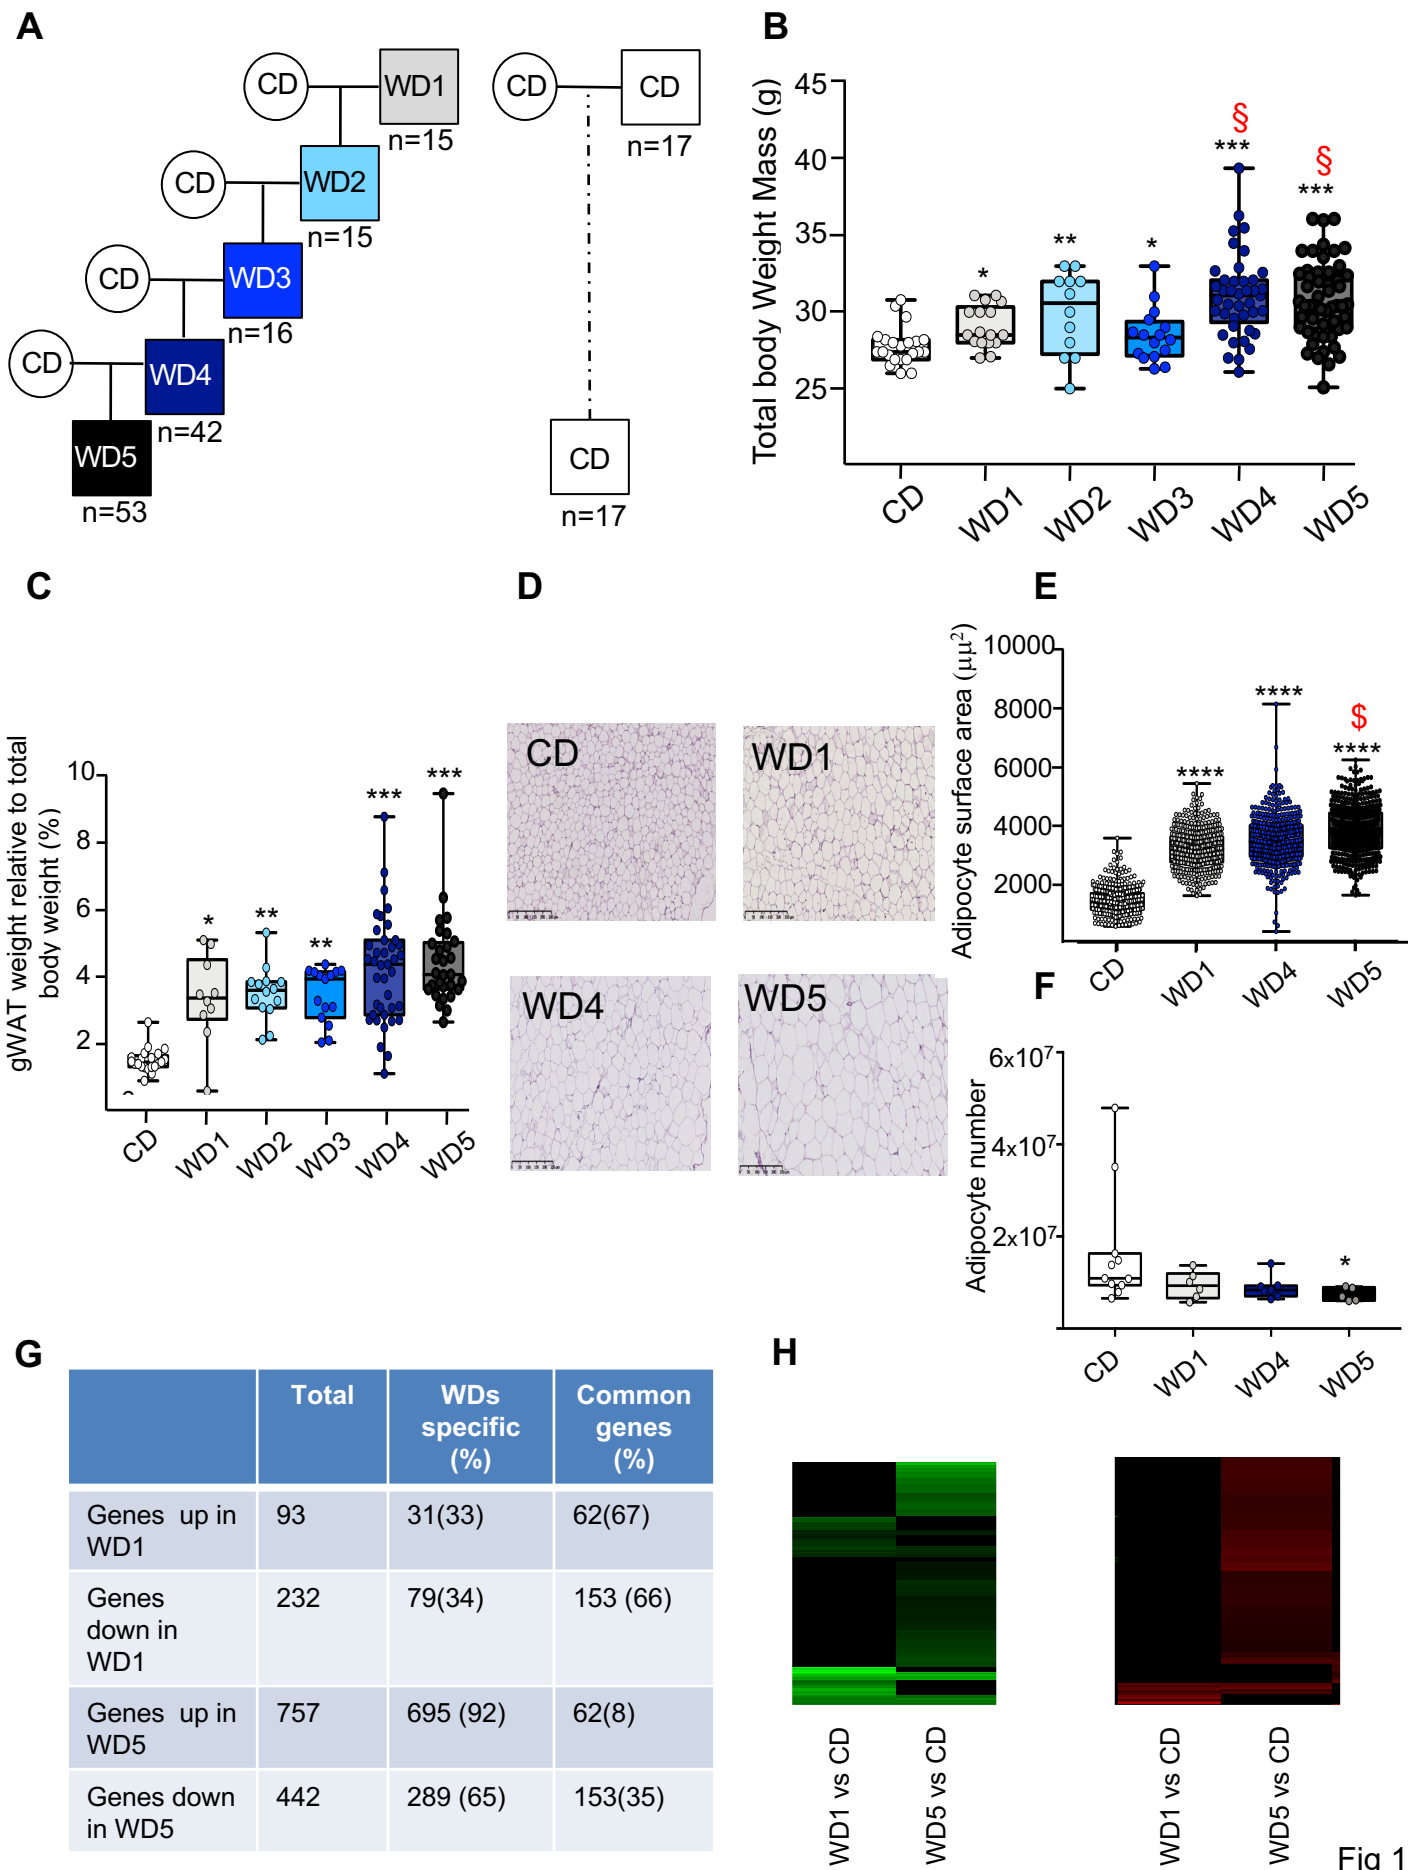

Fig 1

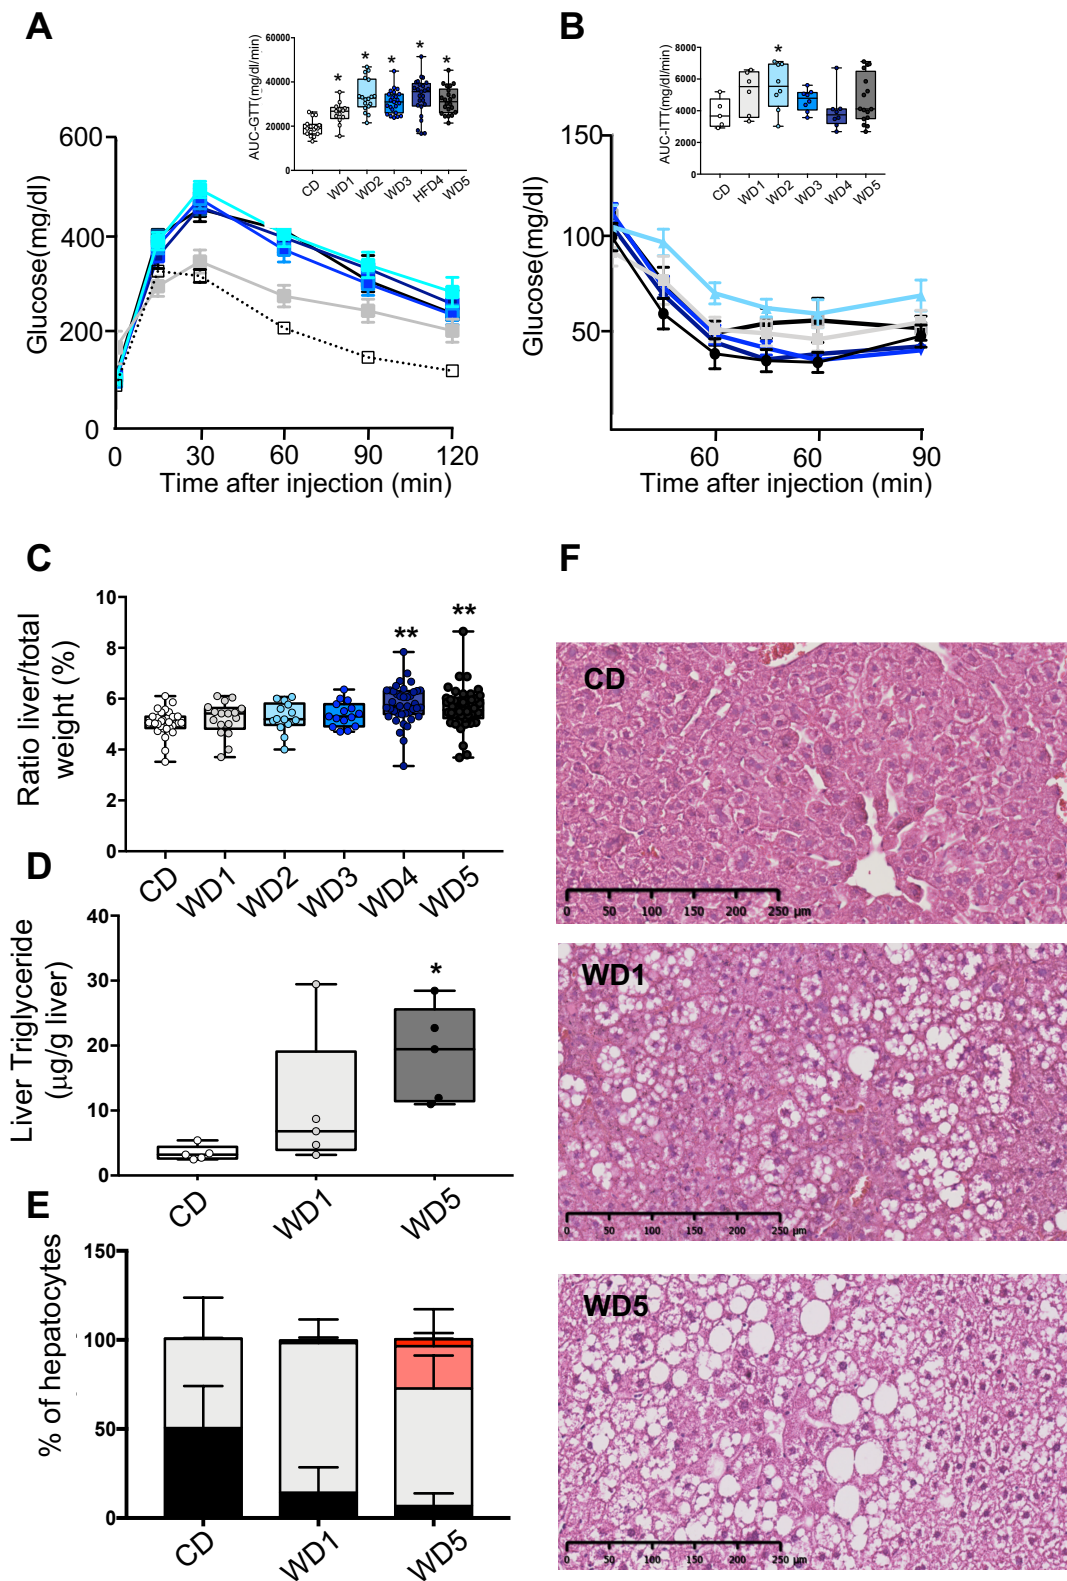

Fig 2

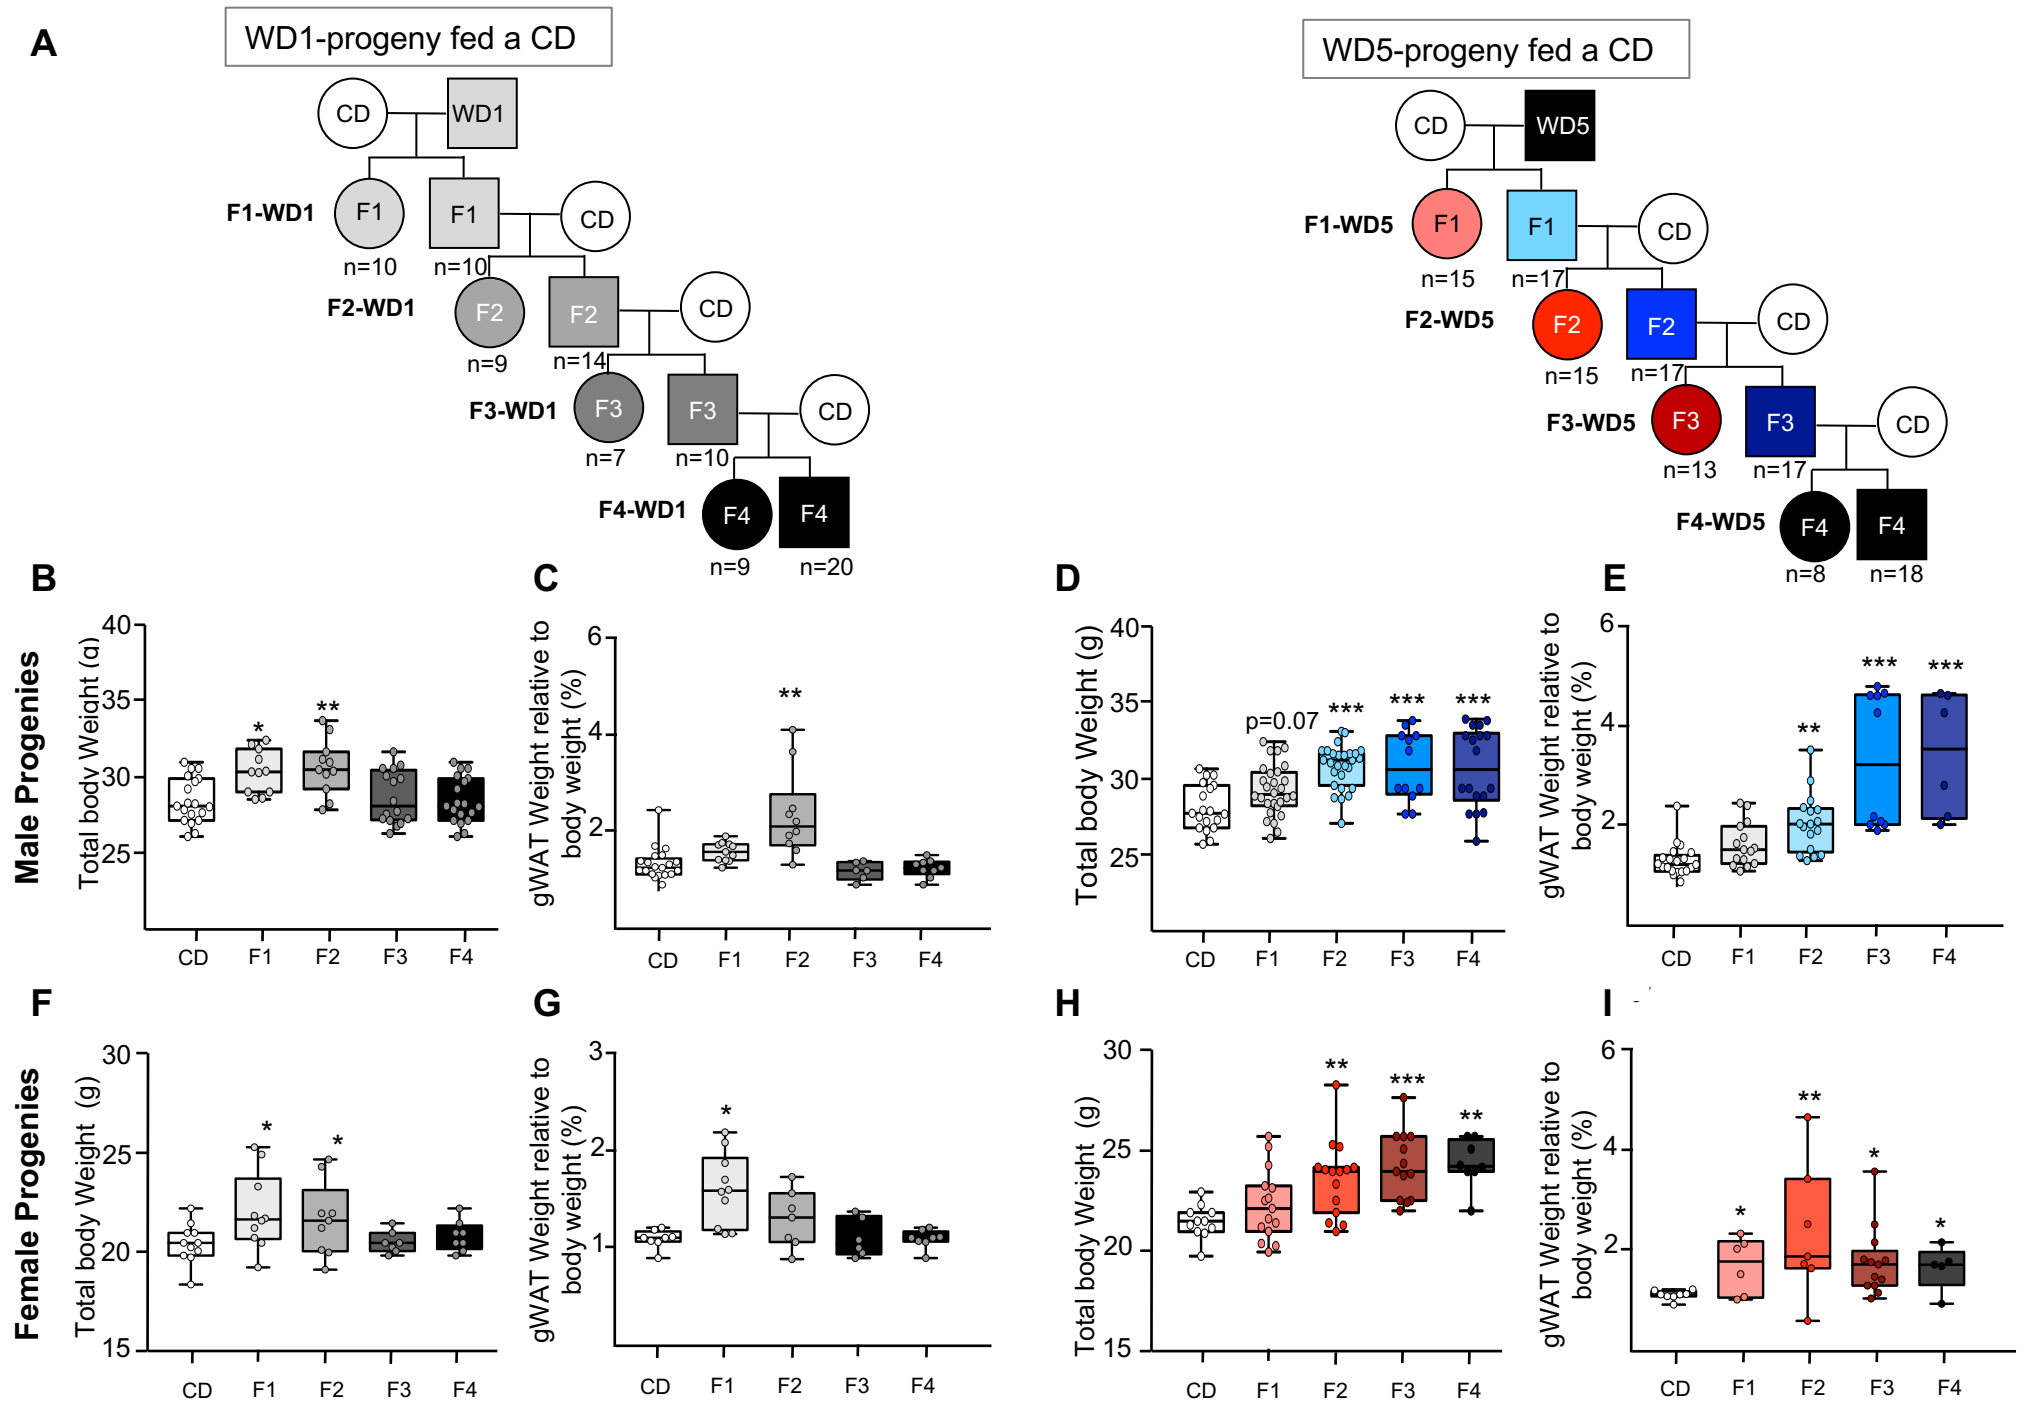

Fig 3

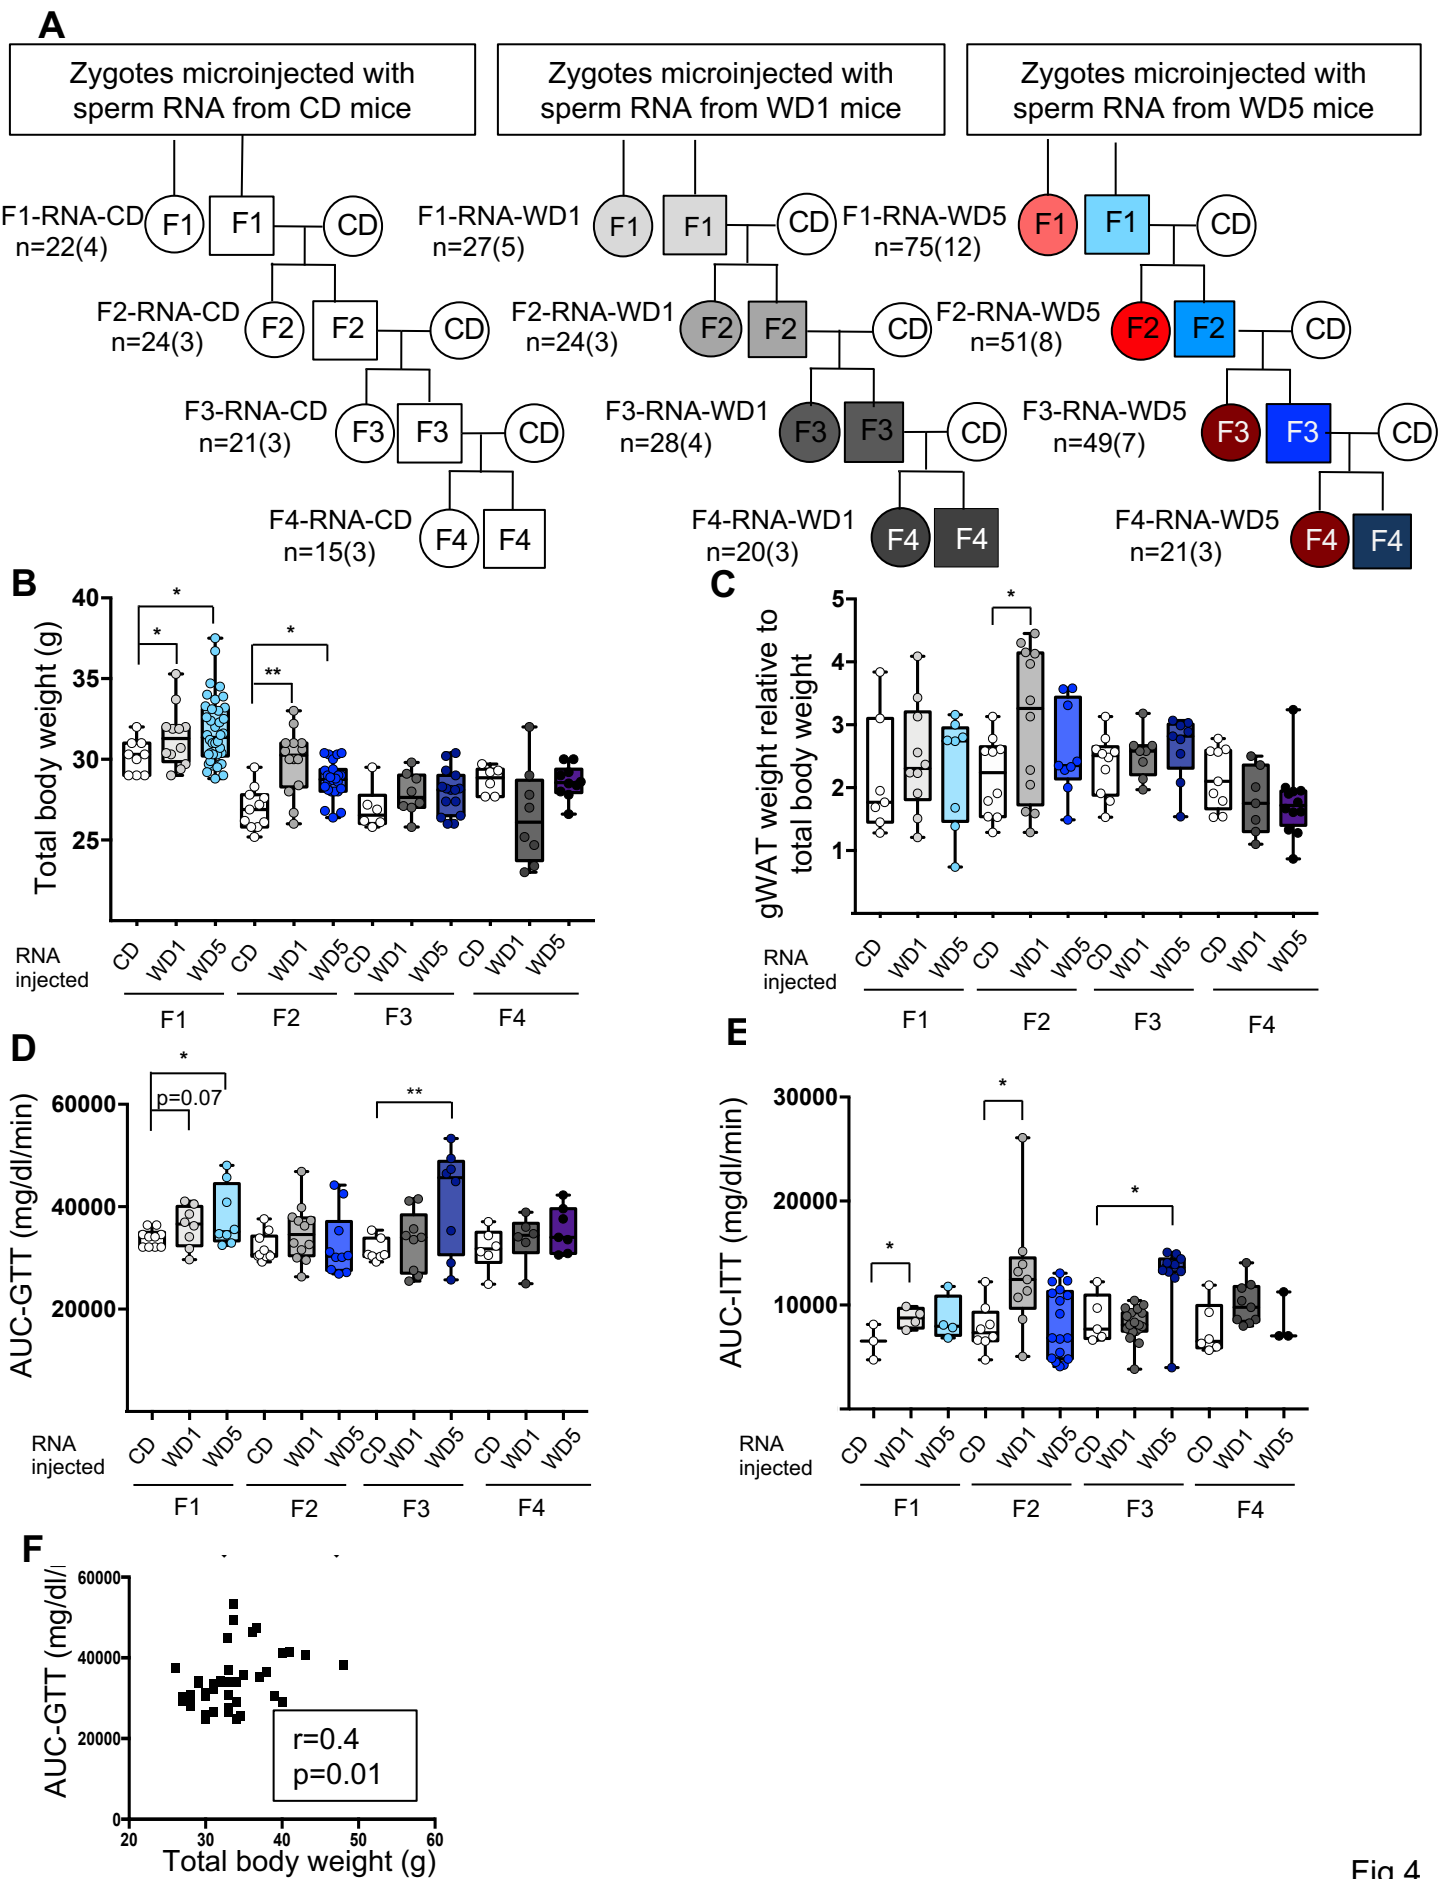

Fig 4
